# Supplementary material
Source: publisher figshare collection journal article supplement (https://geolsoc.figshare.com/ndownloader/files/31316027)
Supplement: Supplementary file 1 [file 31316027]

## Sheet: Humus aqua regia ICP-MS_ICP-AES
log-normalized Pearson moment correlation, humus by aqua regia ICP-MS and ICP-AES n=110	LOI (%)	Ag (ppm)	Al (ppm)	As (ppm)	Au (ppb)	Ba (ppm)	Be (ppm)	Bi (ppm)	Ca (ppm)	Cd (ppm)	Ce (ppm)	Co (ppm)	Cr (ppm)	Cs (ppm)	Cu (ppm)	Dy (ppm)	Er (ppm)	Eu (ppm)	Fe (ppm)	Ga (ppm)	Gd (ppm)	Hf (pm)	Hg (ppm)	Ho (ppm)	In (ppm)	K (ppm)	La (ppm)	Li (ppm)	Lu (ppm)	Mg (ppm)	Mn (ppm)	Mo (ppm)	Na (ppm)	Nb (ppm)	Nd (ppm)	Ni (ppm)	P (ppm)	Pb (ppm)	Pr (ppm)	Pt (ppb)	Rb (ppm)	S (ppm)	Sb (ppm)	Sc (ppm)	Se (ppm)	Sm (ppm)	Sn (ppm)	Sr (ppm)	Ta (ppm)
Ag (ppm)	0.1	1	-0.011	0.15	0.27	0.32	0.067	0.31	0.14	0.29	-0.0098	0.21	-0.043	0.077	0.21	-0.036	-0.065	0.00027	0.1	0.1	-0.003	-0.016	0.27	-0.045	0.25	0.4	-0.0011	0.055	-0.048	0.047	0.23	0.37	-0.083	0.12	0.0031	0.29	0.28	0.27	-0.007	0.3	0.29	0.17	0.33	-0.034	0.27	-0.0046	0.22	0.28	1e-15
Al (ppm)	-0.8	-0.011	1	0.45	-0.055	-0.011	0.7	-0.26	-0.23	-0.46	0.89	0.38	0.9	0.73	-0.051	0.88	0.88	0.88	0.87	0.93	0.87	-0.06	-0.59	0.86	0.041	-0.17	0.76	0.94	0.89	0.72	0.082	0.21	0.63	0.87	0.87	-0.21	-0.07	0.11	0.85	-0.28	0.56	-0.75	0.02	0.77	-0.47	0.88	0.21	-0.074	6.7e-15
As (ppm)	-0.21	0.15	0.45	1	0.57	-0.27	0.28	0.58	-0.31	-0.19	0.38	0.59	0.46	0.39	0.75	0.43	0.45	0.35	0.7	0.57	0.42	0.066	0.13	0.45	0.75	-0.26	0.24	0.33	0.48	0.15	-0.28	0.7	0.12	0.55	0.36	0.61	-0.35	0.65	0.33	0.43	0.24	-0.22	0.6	0.46	0.43	0.38	0.55	-0.36	2.2e-15
Au (ppb)	0.22	0.27	-0.055	0.57	1	-0.2	-0.054	0.64	-0.18	0.017	-0.098	0.42	0.016	-0.095	0.7	-0.068	-0.058	-0.12	0.26	0.039	-0.067	0.11	0.47	-0.016	0.6	-0.14	-0.17	-0.11	-0.028	-0.14	-0.23	0.53	-0.068	0.079	-0.11	0.69	-0.18	0.57	-0.12	0.56	-0.11	0.2	0.66	0.15	0.59	-0.097	0.46	-0.25	5.6e-17
Ba (ppm)	0.072	0.32	-0.011	-0.27	-0.2	1	0.12	-0.098	0.6	0.52	0.095	0.24	-0.092	0.03	-0.22	0.099	0.075	0.16	-0.054	0.01	0.11	-0.19	-0.0064	0.089	-0.16	0.48	0.18	0.14	0.078	0.31	0.63	-0.21	0.15	0.015	0.1	-0.14	0.49	-0.0067	0.11	-0.15	0.29	0.19	-0.15	-0.042	-0.13	0.098	-0.15	0.81	-9.5e-16
Be (ppm)	-0.54	0.067	0.7	0.28	-0.054	0.12	1	-0.24	-0.013	-0.15	0.76	0.36	0.65	0.54	-0.036	0.77	0.76	0.77	0.53	0.58	0.76	-0.071	-0.42	0.79	-0.031	0.019	0.74	0.66	0.75	0.59	0.14	0.16	0.4	0.53	0.76	-0.2	0.11	0.047	0.76	-0.34	0.52	-0.45	-0.035	0.5	-0.37	0.79	0.025	0.14	2e-15
Bi (ppm)	0.54	0.31	-0.26	0.58	0.64	-0.098	-0.24	1	-0.028	0.28	-0.3	0.47	-0.18	-0.059	0.86	-0.17	-0.17	-0.28	0.1	-0.084	-0.17	0.088	0.76	-0.15	0.89	0.036	-0.32	-0.33	-0.16	-0.3	-0.21	0.64	-0.23	-0.081	-0.27	0.93	-0.095	0.75	-0.29	0.77	-0.14	0.51	0.67	-0.11	0.91	-0.25	0.41	-0.2	6e-17
Ca (ppm)	0.31	0.14	-0.23	-0.31	-0.18	0.6	-0.013	-0.028	1	0.63	-0.24	0.26	-0.21	-0.16	-0.14	-0.12	-0.09	-0.1	-0.21	-0.25	-0.12	0.016	0.13	-0.094	-0.15	0.49	-0.14	-0.019	-0.1	0.35	0.64	-0.32	0.0017	-0.2	-0.19	-0.06	0.49	-0.17	-0.19	-0.047	0.13	0.44	-0.18	-0.17	0.047	-0.19	-0.4	0.8	8.8e-16
Cd (ppm)	0.51	0.29	-0.46	-0.19	0.017	0.52	-0.15	0.28	0.63	1	-0.32	0.17	-0.49	-0.24	0.064	-0.27	-0.29	-0.27	-0.38	-0.4	-0.26	-0.0027	0.38	-0.26	0.089	0.32	-0.21	-0.38	-0.33	-0.1	0.48	0.01	-0.21	-0.43	-0.31	0.14	0.44	0.16	-0.3	0.11	-0.051	0.61	0.036	-0.44	0.34	-0.3	-0.15	0.54	-7.3e-17
Ce (ppm)	-0.8	-0.0098	0.89	0.38	-0.098	0.095	0.76	-0.3	-0.24	-0.32	1	0.28	0.79	0.67	-0.094	0.92	0.9	0.95	0.75	0.85	0.93	-0.082	-0.61	0.91	-0.018	-0.17	0.92	0.83	0.88	0.61	0.064	0.22	0.51	0.8	0.96	-0.29	-0.12	0.14	0.96	-0.38	0.52	-0.75	0.021	0.7	-0.5	0.96	0.2	-0.0097	3e-15
Co (ppm)	-0.012	0.21	0.38	0.59	0.42	0.24	0.36	0.47	0.26	0.17	0.28	1	0.42	0.34	0.51	0.42	0.45	0.33	0.61	0.4	0.4	0.0091	0.16	0.47	0.56	0.2	0.24	0.4	0.47	0.52	0.14	0.39	0.33	0.42	0.29	0.55	0.12	0.51	0.27	0.33	0.38	0.076	0.38	0.44	0.36	0.32	0.26	0.25	-2.2e-16
Cr (ppm)	-0.72	-0.043	0.9	0.46	0.016	-0.092	0.65	-0.18	-0.21	-0.49	0.79	0.42	1	0.71	0.048	0.76	0.76	0.76	0.82	0.85	0.75	-0.066	-0.54	0.76	0.1	-0.11	0.63	0.88	0.79	0.72	-0.0087	0.17	0.58	0.82	0.74	-0.094	-0.18	0.11	0.72	-0.17	0.55	-0.68	0.025	0.77	-0.36	0.75	0.16	-0.081	2.1e-15
Cs (ppm)	-0.52	0.077	0.73	0.39	-0.095	0.03	0.54	-0.059	-0.16	-0.24	0.67	0.34	0.71	1	0.003	0.64	0.64	0.63	0.65	0.75	0.64	-0.13	-0.36	0.62	0.15	0.055	0.52	0.69	0.64	0.53	0.2	0.33	0.5	0.63	0.62	-0.08	0.061	0.25	0.6	-0.21	0.7	-0.47	0.11	0.51	-0.27	0.65	0.27	-0.066	3.6e-16
Cu (ppm)	0.28	0.21	-0.051	0.75	0.7	-0.22	-0.036	0.86	-0.14	0.064	-0.094	0.51	0.048	0.003	1	0.017	0.035	-0.095	0.28	0.081	0.012	0.12	0.52	0.059	0.88	-0.11	-0.16	-0.13	0.064	-0.17	-0.34	0.6	-0.12	0.12	-0.085	0.9	-0.34	0.69	-0.1	0.68	-0.056	0.23	0.6	0.11	0.78	-0.064	0.4	-0.29	9.6e-16
Dy (ppm)	-0.69	-0.036	0.88	0.43	-0.068	0.099	0.77	-0.17	-0.12	-0.27	0.92	0.42	0.76	0.64	0.017	1	0.98	0.97	0.78	0.83	0.97	-0.061	-0.48	0.98	0.094	-0.14	0.91	0.79	0.96	0.66	0.048	0.24	0.57	0.74	0.96	-0.18	-0.075	0.21	0.96	-0.28	0.49	-0.63	0.068	0.65	-0.39	0.97	0.18	0.051	-2.9e-16
Er (ppm)	-0.68	-0.065	0.88	0.45	-0.058	0.075	0.76	-0.17	-0.09	-0.29	0.9	0.45	0.76	0.64	0.035	0.98	1	0.95	0.79	0.82	0.95	-0.052	-0.48	0.97	0.1	-0.15	0.87	0.81	0.97	0.68	0.063	0.25	0.57	0.75	0.93	-0.16	-0.07	0.19	0.92	-0.27	0.49	-0.62	0.08	0.69	-0.38	0.94	0.16	0.036	-7.3e-16
Eu (ppm)	-0.74	0.00027	0.88	0.35	-0.12	0.16	0.77	-0.28	-0.1	-0.27	0.95	0.33	0.76	0.63	-0.095	0.97	0.95	1	0.73	0.82	0.96	-0.1	-0.55	0.95	-0.013	-0.1	0.94	0.82	0.93	0.67	0.11	0.19	0.55	0.74	0.98	-0.29	-0.041	0.13	0.97	-0.36	0.52	-0.67	0.032	0.64	-0.48	0.98	0.15	0.11	7.7e-16
Fe (ppm)	-0.64	0.1	0.87	0.7	0.26	-0.054	0.53	0.1	-0.21	-0.38	0.75	0.61	0.82	0.65	0.28	0.78	0.79	0.73	1	0.92	0.76	-0.027	-0.33	0.78	0.38	-0.17	0.58	0.82	0.82	0.62	0.01	0.43	0.52	0.89	0.72	0.16	-0.15	0.39	0.69	0.047	0.49	-0.6	0.32	0.8	-0.13	0.75	0.41	-0.13	1.2e-15
Ga (ppm)	-0.77	0.1	0.93	0.57	0.039	0.01	0.58	-0.084	-0.25	-0.4	0.85	0.4	0.85	0.75	0.081	0.83	0.82	0.82	0.92	1	0.83	-0.069	-0.5	0.81	0.21	-0.15	0.7	0.89	0.83	0.64	0.096	0.34	0.52	0.92	0.82	-0.078	-0.13	0.29	0.8	-0.16	0.57	-0.72	0.17	0.77	-0.33	0.83	0.37	-0.074	3.1e-17
Gd (ppm)	-0.7	-0.003	0.87	0.42	-0.067	0.11	0.76	-0.17	-0.12	-0.26	0.93	0.4	0.75	0.64	0.012	0.97	0.95	0.96	0.76	0.83	1	-0.091	-0.48	0.96	0.11	-0.12	0.93	0.8	0.92	0.64	0.065	0.25	0.51	0.74	0.97	-0.18	-0.085	0.23	0.96	-0.27	0.5	-0.64	0.086	0.64	-0.38	0.97	0.2	0.067	-4.9e-16
Hf (pm)	0.08	-0.016	-0.06	0.066	0.11	-0.19	-0.071	0.088	0.016	-0.0027	-0.082	0.0091	-0.066	-0.13	0.12	-0.061	-0.052	-0.1	-0.027	-0.069	-0.091	1	0.053	-0.043	0.1	-0.14	-0.11	-0.083	-0.072	-0.11	-0.087	0.042	-0.11	-0.045	-0.1	0.11	-0.064	0.14	-0.095	0.13	-0.1	0.053	0.11	-0.018	0.11	-0.1	0.066	-0.13	-1.6e-15
Hg (ppm)	0.82	0.27	-0.59	0.13	0.47	-0.0064	-0.42	0.76	0.13	0.38	-0.61	0.16	-0.54	-0.36	0.52	-0.48	-0.48	-0.55	-0.33	-0.5	-0.48	0.053	1	-0.47	0.52	0.18	-0.53	-0.62	-0.49	-0.51	-0.12	0.4	-0.33	-0.44	-0.55	0.71	0.14	0.46	-0.55	0.69	-0.32	0.81	0.57	-0.41	0.83	-0.54	0.19	-0.065	8.4e-16
Ho (ppm)	-0.67	-0.045	0.86	0.45	-0.016	0.089	0.79	-0.15	-0.094	-0.26	0.91	0.47	0.76	0.62	0.059	0.98	0.97	0.95	0.78	0.81	0.96	-0.043	-0.47	1	0.12	-0.12	0.89	0.79	0.97	0.67	0.046	0.24	0.55	0.75	0.94	-0.14	-0.069	0.22	0.93	-0.24	0.49	-0.6	0.083	0.68	-0.37	0.96	0.17	0.068	1.6e-15
In (ppm)	0.23	0.25	0.041	0.75	0.6	-0.16	-0.031	0.89	-0.15	0.089	-0.018	0.56	0.1	0.15	0.88	0.094	0.1	-0.013	0.38	0.21	0.11	0.1	0.52	0.12	1	-0.071	-0.089	-0.054	0.11	-0.15	-0.25	0.7	-0.14	0.19	0.0011	0.86	-0.26	0.81	-0.024	0.69	0.007	0.19	0.68	0.14	0.77	0.025	0.48	-0.25	-4.1e-15
K (ppm)	0.27	0.4	-0.17	-0.26	-0.14	0.48	0.019	0.036	0.49	0.32	-0.17	0.2	-0.11	0.055	-0.11	-0.14	-0.15	-0.1	-0.17	-0.15	-0.12	-0.14	0.18	-0.12	-0.071	1	-0.13	0.002	-0.14	0.21	0.46	-0.14	-0.027	-0.096	-0.15	0.046	0.52	-0.047	-0.15	0.046	0.51	0.36	-0.047	-0.16	0.11	-0.14	-0.18	0.54	-6.3e-16
La (ppm)	-0.69	-0.0011	0.76	0.24	-0.17	0.18	0.74	-0.32	-0.14	-0.21	0.92	0.24	0.63	0.52	-0.16	0.91	0.87	0.94	0.58	0.7	0.93	-0.11	-0.53	0.89	-0.089	-0.13	1	0.7	0.84	0.55	0.039	0.13	0.45	0.62	0.97	-0.34	-0.076	0.076	0.98	-0.39	0.42	-0.63	-0.032	0.55	-0.5	0.95	0.1	0.12	8.8e-16
Li (ppm)	-0.78	0.055	0.94	0.33	-0.11	0.14	0.66	-0.33	-0.019	-0.38	0.83	0.4	0.88	0.69	-0.13	0.79	0.81	0.82	0.82	0.89	0.8	-0.083	-0.62	0.79	-0.054	0.002	0.7	1	0.82	0.85	0.23	0.055	0.59	0.88	0.79	-0.27	-0.0052	0.0056	0.77	-0.32	0.64	-0.71	-0.08	0.79	-0.5	0.8	0.11	0.15	-1.1e-16
LOI (%)	1	0.1	-0.8	-0.21	0.22	0.072	-0.54	0.54	0.31	0.51	-0.8	-0.012	-0.72	-0.52	0.28	-0.69	-0.68	-0.74	-0.64	-0.77	-0.7	0.08	0.82	-0.67	0.23	0.27	-0.69	-0.78	-0.69	-0.55	-0.063	0.047	-0.38	-0.7	-0.76	0.5	0.26	0.17	-0.75	0.47	-0.46	0.95	0.23	-0.64	0.69	-0.75	-0.15	0.11	-2.6e-15
Lu (ppm)	-0.69	-0.048	0.89	0.48	-0.028	0.078	0.75	-0.16	-0.1	-0.33	0.88	0.47	0.79	0.64	0.064	0.96	0.97	0.93	0.82	0.83	0.92	-0.072	-0.49	0.97	0.11	-0.14	0.84	0.82	1	0.68	0.031	0.23	0.59	0.78	0.91	-0.13	-0.1	0.18	0.9	-0.25	0.5	-0.63	0.069	0.73	-0.37	0.93	0.15	0.023	2.2e-15
Mg (ppm)	-0.55	0.047	0.72	0.15	-0.14	0.31	0.59	-0.3	0.35	-0.1	0.61	0.52	0.72	0.53	-0.17	0.66	0.68	0.67	0.62	0.64	0.64	-0.11	-0.51	0.67	-0.15	0.21	0.55	0.85	0.68	1	0.4	-0.11	0.6	0.62	0.6	-0.26	0.19	-0.12	0.59	-0.31	0.63	-0.43	-0.18	0.61	-0.42	0.61	-0.095	0.44	-6.3e-15
Mn (ppm)	-0.063	0.23	0.082	-0.28	-0.23	0.63	0.14	-0.21	0.64	0.48	0.064	0.14	-0.0087	0.2	-0.34	0.048	0.063	0.11	0.01	0.096	0.065	-0.087	-0.12	0.046	-0.25	0.46	0.039	0.23	0.031	0.4	1	-0.14	0.22	0.061	0.046	-0.29	0.61	-0.087	0.04	-0.25	0.44	0.085	-0.16	-0.04	-0.23	0.051	-0.14	0.61	-1.5e-15
Mo (ppm)	0.047	0.37	0.21	0.7	0.53	-0.21	0.16	0.64	-0.32	0.01	0.22	0.39	0.17	0.33	0.6	0.24	0.25	0.19	0.43	0.34	0.25	0.042	0.4	0.24	0.7	-0.14	0.13	0.055	0.23	-0.11	-0.14	1	-0.013	0.27	0.22	0.57	-0.02	0.74	0.2	0.47	0.074	0.066	0.77	0.18	0.51	0.24	0.62	-0.38	1.4e-17
Na (ppm)	-0.38	-0.083	0.63	0.12	-0.068	0.15	0.4	-0.23	0.0017	-0.21	0.51	0.33	0.58	0.5	-0.12	0.57	0.57	0.55	0.52	0.52	0.51	-0.11	-0.33	0.55	-0.14	-0.027	0.45	0.59	0.59	0.6	0.22	-0.013	1	0.48	0.51	-0.16	0.1	-0.069	0.5	-0.23	0.4	-0.34	-0.13	0.56	-0.38	0.52	-0.078	0.057	-1.2e-15
Nb (ppm)	-0.7	0.12	0.87	0.55	0.079	0.015	0.53	-0.081	-0.2	-0.43	0.8	0.42	0.82	0.63	0.12	0.74	0.75	0.74	0.89	0.92	0.74	-0.045	-0.44	0.75	0.19	-0.096	0.62	0.88	0.78	0.62	0.061	0.27	0.48	1	0.73	-0.011	-0.21	0.22	0.71	-0.11	0.55	-0.66	0.16	0.82	-0.28	0.74	0.27	-0.053	-5.2e-16
Nd (ppm)	-0.76	0.0031	0.87	0.36	-0.11	0.1	0.76	-0.27	-0.19	-0.31	0.96	0.29	0.74	0.62	-0.085	0.96	0.93	0.98	0.72	0.82	0.97	-0.1	-0.55	0.94	0.0011	-0.15	0.97	0.79	0.91	0.6	0.046	0.22	0.51	0.73	1	-0.28	-0.098	0.14	1	-0.35	0.48	-0.7	0.043	0.64	-0.48	0.99	0.17	0.031	1.3e-15
Ni (ppm)	0.5	0.29	-0.21	0.61	0.69	-0.14	-0.2	0.93	-0.06	0.14	-0.29	0.55	-0.094	-0.08	0.9	-0.18	-0.16	-0.29	0.16	-0.078	-0.18	0.11	0.71	-0.14	0.86	0.046	-0.34	-0.27	-0.13	-0.26	-0.29	0.57	-0.16	-0.011	-0.28	1	-0.18	0.67	-0.3	0.79	-0.12	0.45	0.64	0.0017	0.88	-0.26	0.36	-0.22	1.6e-15
P (ppm)	0.26	0.28	-0.07	-0.35	-0.18	0.49	0.11	-0.095	0.49	0.44	-0.12	0.12	-0.18	0.061	-0.34	-0.075	-0.07	-0.041	-0.15	-0.13	-0.085	-0.064	0.14	-0.069	-0.26	0.52	-0.076	-0.0052	-0.1	0.19	0.61	-0.02	0.1	-0.21	-0.098	-0.18	1	-0.059	-0.095	-0.11	0.19	0.43	-0.074	-0.29	-0.086	-0.083	-0.054	0.49	1e-15
Pb (ppm)	0.17	0.27	0.11	0.65	0.57	-0.0067	0.047	0.75	-0.17	0.16	0.14	0.51	0.11	0.25	0.69	0.21	0.19	0.13	0.39	0.29	0.23	0.14	0.46	0.22	0.81	-0.047	0.076	0.0056	0.18	-0.12	-0.087	0.74	-0.069	0.22	0.14	0.67	-0.059	1	0.12	0.55	0.063	0.17	0.77	0.11	0.61	0.16	0.72	-0.17	1.5e-15
Pr (ppm)	-0.75	-0.007	0.85	0.33	-0.12	0.11	0.76	-0.29	-0.19	-0.3	0.96	0.27	0.72	0.6	-0.1	0.96	0.92	0.97	0.69	0.8	0.96	-0.095	-0.55	0.93	-0.024	-0.15	0.98	0.77	0.9	0.59	0.04	0.2	0.5	0.71	1	-0.3	-0.095	0.12	1	-0.36	0.47	-0.69	0.024	0.62	-0.5	0.99	0.16	0.04	-3.6e-18
Pt (ppb)	0.47	0.3	-0.28	0.43	0.56	-0.15	-0.34	0.77	-0.047	0.11	-0.38	0.33	-0.17	-0.21	0.68	-0.28	-0.27	-0.36	0.047	-0.16	-0.27	0.13	0.69	-0.24	0.69	0.046	-0.39	-0.32	-0.25	-0.31	-0.25	0.47	-0.23	-0.11	-0.35	0.79	-0.11	0.55	-0.36	1	-0.17	0.44	0.51	-0.1	0.78	-0.33	0.36	-0.19	-7.4e-16
Rb (ppm)	-0.46	0.29	0.56	0.24	-0.11	0.29	0.52	-0.14	0.13	-0.051	0.52	0.38	0.55	0.7	-0.056	0.49	0.49	0.52	0.49	0.57	0.5	-0.1	-0.32	0.49	0.007	0.51	0.42	0.64	0.5	0.63	0.44	0.074	0.4	0.55	0.48	-0.12	0.19	0.063	0.47	-0.17	1	-0.34	-0.016	0.42	-0.24	0.5	0.12	0.26	-6.8e-16
S (ppm)	0.95	0.17	-0.75	-0.22	0.2	0.19	-0.45	0.51	0.44	0.61	-0.75	0.076	-0.68	-0.47	0.23	-0.63	-0.62	-0.67	-0.6	-0.72	-0.64	0.053	0.81	-0.6	0.19	0.36	-0.63	-0.71	-0.63	-0.43	0.085	0.066	-0.34	-0.66	-0.7	0.45	0.43	0.17	-0.69	0.44	-0.34	1	0.23	-0.62	0.65	-0.69	-0.12	0.24	-5.7e-15
Sb (ppm)	0.23	0.33	0.02	0.6	0.66	-0.15	-0.035	0.67	-0.18	0.036	0.021	0.38	0.025	0.11	0.6	0.068	0.08	0.032	0.32	0.17	0.086	0.11	0.57	0.083	0.68	-0.047	-0.032	-0.08	0.069	-0.18	-0.16	0.77	-0.13	0.16	0.043	0.64	-0.074	0.77	0.024	0.51	-0.016	0.23	1	0.11	0.61	0.053	0.57	-0.22	1.8e-16
Sc (ppm)	-0.64	-0.034	0.77	0.46	0.15	-0.042	0.5	-0.11	-0.17	-0.44	0.7	0.44	0.77	0.51	0.11	0.65	0.69	0.64	0.8	0.77	0.64	-0.018	-0.41	0.68	0.14	-0.16	0.55	0.79	0.73	0.61	-0.04	0.18	0.56	0.82	0.64	0.0017	-0.29	0.11	0.62	-0.1	0.42	-0.62	0.11	1	-0.28	0.65	0.19	-0.12	1.7e-16
Se (ppm)	0.69	0.27	-0.47	0.43	0.59	-0.13	-0.37	0.91	0.047	0.34	-0.5	0.36	-0.36	-0.27	0.78	-0.39	-0.38	-0.48	-0.13	-0.33	-0.38	0.11	0.83	-0.37	0.77	0.11	-0.5	-0.5	-0.37	-0.42	-0.23	0.51	-0.38	-0.28	-0.48	0.88	-0.086	0.61	-0.5	0.78	-0.24	0.65	0.61	-0.28	1	-0.47	0.3	-0.16	4.6e-16
Sm (ppm)	-0.75	-0.0046	0.88	0.38	-0.097	0.098	0.79	-0.25	-0.19	-0.3	0.96	0.32	0.75	0.65	-0.064	0.97	0.94	0.98	0.75	0.83	0.97	-0.1	-0.54	0.96	0.025	-0.14	0.95	0.8	0.93	0.61	0.051	0.24	0.52	0.74	0.99	-0.26	-0.083	0.16	0.99	-0.33	0.5	-0.69	0.053	0.65	-0.47	1	0.19	0.031	-4.9e-16
Sn (ppm)	-0.15	0.22	0.21	0.55	0.46	-0.15	0.025	0.41	-0.4	-0.15	0.2	0.26	0.16	0.27	0.4	0.18	0.16	0.15	0.41	0.37	0.2	0.066	0.19	0.17	0.48	-0.18	0.1	0.11	0.15	-0.095	-0.14	0.62	-0.078	0.27	0.17	0.36	-0.054	0.72	0.16	0.36	0.12	-0.12	0.57	0.19	0.3	0.19	1	-0.32	-4.1e-16
Sr (ppm)	0.11	0.28	-0.074	-0.36	-0.25	0.81	0.14	-0.2	0.8	0.54	-0.0097	0.25	-0.081	-0.066	-0.29	0.051	0.036	0.11	-0.13	-0.074	0.067	-0.13	-0.065	0.068	-0.25	0.54	0.12	0.15	0.023	0.44	0.61	-0.38	0.057	-0.053	0.031	-0.22	0.49	-0.17	0.04	-0.19	0.26	0.24	-0.22	-0.12	-0.16	0.031	-0.32	1	-1.6e-15
Ta (ppm)	-2.6e-15	1e-15	6.7e-15	2.2e-15	5.6e-17	-9.5e-16	2e-15	6e-17	8.8e-16	-7.3e-17	3e-15	-2.2e-16	2.1e-15	3.6e-16	9.6e-16	-2.9e-16	-7.3e-16	7.7e-16	1.2e-15	3.1e-17	-4.9e-16	-1.6e-15	8.4e-16	1.6e-15	-4.1e-15	-6.3e-16	8.8e-16	-1.1e-16	2.2e-15	-6.3e-15	-1.5e-15	1.4e-17	-1.2e-15	-5.2e-16	1.3e-15	1.6e-15	1e-15	1.5e-15	-3.6e-18	-7.4e-16	-6.8e-16	-5.7e-15	1.8e-16	1.7e-16	4.6e-16	-4.9e-16	-4.1e-16	-1.6e-15	1
Tb (ppm)	-0.68	-0.029	0.86	0.42	-0.059	0.11	0.74	-0.16	-0.12	-0.25	0.92	0.41	0.73	0.61	0.018	0.97	0.95	0.96	0.76	0.82	0.99	-0.088	-0.47	0.96	0.11	-0.14	0.92	0.78	0.93	0.62	0.045	0.25	0.51	0.73	0.96	-0.17	-0.088	0.23	0.96	-0.25	0.46	-0.62	0.089	0.63	-0.37	0.97	0.19	0.064	1.2e-15
Te (ppm)	0.17	0.26	0.1	0.81	0.69	-0.17	-0.035	0.84	-0.089	0.034	-0.009	0.61	0.17	0.15	0.91	0.083	0.11	-0.015	0.46	0.25	0.089	0.092	0.47	0.12	0.89	-0.04	-0.12	0.05	0.14	-0.01	-0.19	0.66	-0.039	0.28	-0.019	0.87	-0.24	0.72	-0.044	0.71	0.1	0.15	0.63	0.22	0.73	0.0075	0.49	-0.24	1.3e-15
Th (ppm)	-0.64	-0.056	0.54	0.12	-0.092	-0.042	0.33	-0.35	-0.047	-0.39	0.5	0.16	0.53	0.34	-0.16	0.4	0.43	0.44	0.51	0.52	0.38	0.019	-0.54	0.41	-0.16	-0.1	0.38	0.64	0.47	0.54	0.054	-0.098	0.3	0.64	0.43	-0.26	-0.29	-0.2	0.42	-0.34	0.33	-0.62	-0.14	0.71	-0.43	0.44	-0.001	0.013	-6.5e-16
Ti (ppm)	-0.75	0.033	0.86	0.43	-0.013	0.019	0.5	-0.2	-0.12	-0.44	0.74	0.39	0.82	0.59	-0.012	0.7	0.72	0.7	0.86	0.89	0.69	-0.048	-0.53	0.7	0.056	-0.11	0.57	0.9	0.75	0.71	0.13	0.14	0.53	0.95	0.68	-0.13	-0.18	0.069	0.66	-0.19	0.53	-0.7	0.042	0.87	-0.39	0.7	0.19	-0.012	-1.9e-15
Tl (ppm)	-0.16	0.29	0.39	0.44	0.16	0.16	0.3	0.34	-0.0079	0.19	0.36	0.35	0.31	0.6	0.27	0.37	0.38	0.34	0.41	0.45	0.39	-0.033	0.066	0.36	0.4	0.0097	0.25	0.31	0.34	0.23	0.34	0.49	0.3	0.34	0.34	0.22	0.15	0.48	0.31	0.086	0.42	-0.11	0.33	0.2	0.13	0.34	0.32	-0.026	2.6e-15
Tm (ppm)	-0.68	-0.092	0.88	0.47	-0.0065	0.042	0.78	-0.17	-0.13	-0.31	0.9	0.45	0.79	0.63	0.057	0.96	0.97	0.93	0.8	0.82	0.94	-0.065	-0.49	0.98	0.1	-0.15	0.86	0.8	0.97	0.66	0.029	0.23	0.6	0.76	0.92	-0.14	-0.093	0.21	0.91	-0.26	0.49	-0.63	0.075	0.71	-0.37	0.94	0.15	0.0088	2.2e-17
U (ppm)	-0.61	0.02	0.77	0.52	0.041	-0.12	0.63	-0.062	-0.38	-0.39	0.83	0.25	0.67	0.67	0.12	0.81	0.78	0.81	0.66	0.72	0.82	-0.038	-0.37	0.78	0.2	-0.2	0.77	0.61	0.78	0.34	-0.13	0.44	0.34	0.63	0.84	-0.07	-0.19	0.31	0.83	-0.19	0.38	-0.6	0.24	0.51	-0.25	0.84	0.32	-0.24	0
V (ppm)	-0.73	0.071	0.92	0.58	0.088	-0.00048	0.58	-0.049	-0.15	-0.36	0.82	0.49	0.84	0.69	0.12	0.83	0.84	0.8	0.95	0.95	0.81	-0.035	-0.44	0.82	0.23	-0.18	0.66	0.88	0.85	0.69	0.098	0.37	0.55	0.91	0.79	-0.032	-0.12	0.28	0.76	-0.099	0.53	-0.66	0.21	0.81	-0.28	0.81	0.32	-0.057	3e-15
W (ppm)	0.28	0.2	0.024	0.39	0.4	-0.061	-0.08	0.59	0.079	0.15	-0.086	0.5	0.11	0.21	0.48	0.0091	0.047	-0.061	0.24	0.098	-0.0075	0.065	0.38	0.028	0.5	0.061	-0.15	0.0098	0.018	0.11	-0.04	0.51	0.058	0.1	-0.093	0.56	0.083	0.43	-0.11	0.43	0.044	0.28	0.45	0.09	0.49	-0.075	0.22	-0.068	-3.3e-16
Y (ppm)	-0.65	-0.053	0.84	0.42	-0.033	0.1	0.81	-0.17	-0.064	-0.22	0.9	0.46	0.73	0.59	0.041	0.98	0.97	0.95	0.74	0.78	0.96	-0.062	-0.47	0.99	0.085	-0.13	0.91	0.77	0.95	0.67	0.058	0.22	0.56	0.71	0.94	-0.16	-0.066	0.2	0.94	-0.28	0.47	-0.59	0.058	0.65	-0.37	0.95	0.13	0.085	-5.8e-16
Yb (ppm)	-0.7	-0.051	0.9	0.45	-0.019	0.077	0.78	-0.17	-0.1	-0.3	0.9	0.45	0.8	0.64	0.044	0.97	0.97	0.94	0.82	0.84	0.95	-0.059	-0.49	0.97	0.098	-0.13	0.86	0.82	0.97	0.69	0.076	0.23	0.63	0.78	0.93	-0.15	-0.071	0.19	0.92	-0.26	0.51	-0.64	0.071	0.71	-0.38	0.94	0.15	0.03	1.1e-15
Zn (ppm)	0.05	0.16	-0.026	-0.31	-0.22	0.71	0.23	-0.23	0.62	0.67	0.11	0.18	-0.11	-0.044	-0.37	0.11	0.088	0.18	-0.12	-0.07	0.11	-0.14	-0.1	0.12	-0.32	0.31	0.22	0.089	0.06	0.35	0.56	-0.23	0.12	-0.11	0.12	-0.33	0.56	-0.13	0.14	-0.29	0.17	0.21	-0.2	-0.1	-0.22	0.12	-0.22	0.74	-4.1e-16
Zr (ppm)	-0.13	-0.14	-0.025	-0.17	-0.01	-0.18	-0.023	-0.21	0.059	-0.18	-0.05	0.015	0.032	-0.18	-0.12	-0.088	-0.038	-0.079	0.0057	-0.081	-0.11	0.1	-0.18	-0.041	-0.16	-0.034	-0.087	0.082	-0.009	0.17	-0.15	-0.15	-0.06	0.064	-0.088	-0.11	-0.24	-0.3	-0.087	-0.13	-0.077	-0.14	-0.1	0.28	-0.09	-0.071	-0.19	-0.0025	3.6e-16
[truncated: 13 more columns]
